# Supplementary material
Source: PubMed Central journal article supplement (PMC5752288)
Supplement: jciinsight-2-94200-s001.pdf [file jciinsight-2-94200-s001.pdf]

## **Supplemental Results and Discussion**

### *Gender Analysis*

Gender effects were analyzed first in regards to phenotypic variables, and then in regards to analytes. In phenotypic variables there were no differences in male versus female for maternal 2nd trimester nutrients (including FFA) or for offspring BW or %FM in the total cohort. While the NW and OB cohorts separately had no differences in these parameters either, in regard to gender, the OB cohort alone had 15% higher ppBMI in the mothers of females (Mean  $40.8 \pm 3.95 \text{ kg/m}^2$ ) versus males ( $34.3 \pm 1.95 \text{ kg/m}^2$ ,  $p=0.009$ ). This is of unclear significance.

In metabolite analysis we found several significant gender-stratified correlations, however none were sufficient to attribute gender as a primary driver in our results. In uMSC-myocytes neonatal %FM in offspring of OB, but not NW, mothers initially correlated with elevations in a large number of LCAC and LCOH species indicating incomplete beta-oxidation. In males only we found positive correlations with C12:1 ( $p=0.05$ ,  $r=0.82$ ) and C18:1OH ( $p=0.04$ ,  $r=0.84$ ). In females only we found positive correlations with C16:1 ( $p=0.04$ ,  $r=0.96$ ), C12:1OH ( $p=0.04$ ,  $r=0.96$ ), and C16:1OH ( $p=0.009$ ,  $r=0.99$ ). Neither gender separately demonstrated positive correlation for other VLCAD and LCHAD associated species found in the total OB-only cohort including C12, C14:2, C14:1, C14, C18:2, C14:1OH, or C14OH (see Table S2A).

Compensatory increase in omega-oxidation, as evident by dicarboxylic species, was more prominently found in males of OB mothers in relation to %FM. This included positive correlations with C5DC ( $p=0.002$ ,  $r=0.96$ ) and total DCAC ( $p=0.04$ ,  $r=0.84$ ). C6DC was found in the total OB cohort, and not gender specific. For maternal FFA, which also initially correlated with elevations in DCAC in the OB cohort, demonstrated positive correlations with C5DC ( $p=0.03$ ,  $r=0.99$ ), C6DC ( $p=0.03$ ,  $r=0.99$ ), and Total DCAC ( $p=0.05$ ,  $r=0.99$ ) primarily in females from the OB cohort, as well as lower free carnitine levels (C0,  $p=0.04$ ,  $r=0.99$ ) which are also negatively correlated with established obesity. These FFA results from OB cohort females only should be taken with caution however, since there were only an  $n=3$  in this subcohort, potentially falsely skewing gender specific results. DCAC and FFA positive correlations from the total OB cohort remain much stronger by  $p$ -value and  $r$ -value with both genders combined.

Finally, in relation to %FM, amino acids associated with anaplerosis demonstrated gender-specificity, but the same pathway of glutamine/aspartate/alanine metabolism remained enriched. Glutamine remained negatively correlated with %FM only in male offspring of OB, but not NW, mothers ( $p=0.04$ ,  $r=-0.84$ ), while Aspartate ( $p=0.01$ ,  $r=0.99$ ), Asparagine ( $p=0.01$ ,  $r=0.99$ ), and Alanine ( $p=0.01$ ,  $r=0.99$ ) were all positively correlated with %FM in female offspring of OB, but not NW, mothers. Maternal FFA correlated with Aspartate in a non-gender dependent manner. Alanine was positively correlated with male gender ( $p=0.005$ ,  $r=0.73$ ), specifically in the NW cohort ( $p=0.03$ ,  $r=0.85$ ). Only in females from the OB cohort did we find correlations with 1-carbon metabolites including Glycine ( $p=0.003$ ,  $r=-0.99$ ), Methionine ( $p=0.01$ ,  $r=0.99$ ), and Cystathionine ( $p=0.008$ ,  $r=-0.99$ ). Results should also (as above) be considered in light of the lower  $n=3$  in females from the OB cohort. In only males of OB mothers Phenylalanine ( $p=0.03$ ,  $r=0.81$ ), Tyrosine ( $p=0.03$ ,  $r=0.81$ ), and total Aromatic Amino Acids ( $p=0.03$ ,  $r=0.81$ ) were also positively correlated with FFA. This is a stronger, but similar correlation to the total OB cohort. These 1-Carbon and Aromatic Amino Acids are associated with established obesity, and patterns found in children at risk for obesity. Taken together, in uMSC-myocytes, this indicates some gender specific differences but an unchanged overall outcome of beta-oxidative dysfunction at VLCAD and LCHAD with compensatory omega-oxidation and amino acid metabolism, largely dependent on maternal obesity, FFA, and neonatal %FM.

In uMSC-adipocytes where we originally found very few analyte correlations with %FM and FFA, we found weak negative correlations between FFA and medium chain acylcarnitines species C8 ( $p=0.03$ ,  $r=-0.76$ ), C8OH ( $p=0.02$ ,  $r=-0.80$ ), C10 ( $p=0.02$ ,  $r=-0.78$ ), C12 ( $p=0.05$ ,  $r=-0.71$ ), and C12OH ( $p=0.05$ ,  $r=-0.70$ ) in cells from female offspring but not males (total female cohort,  $n=9$ ). No other significant pathway enriching correlations between analytes, %FM, FFA, and gender were found.

## Supplemental Figures and Legends

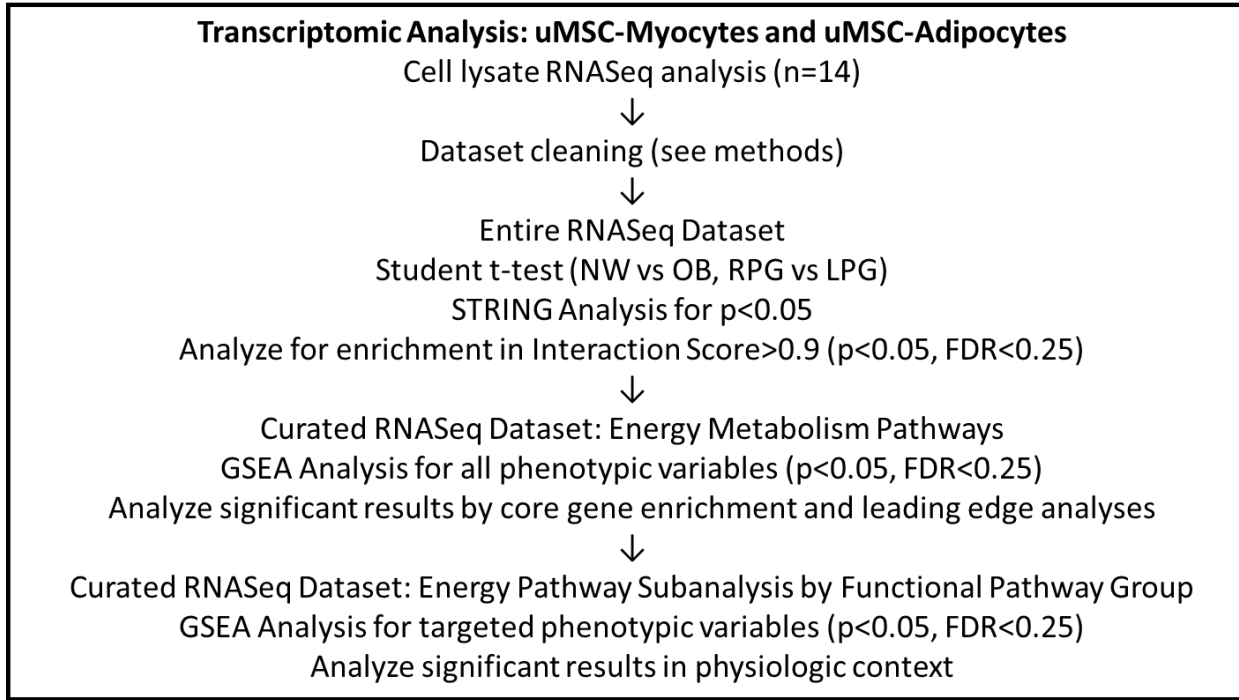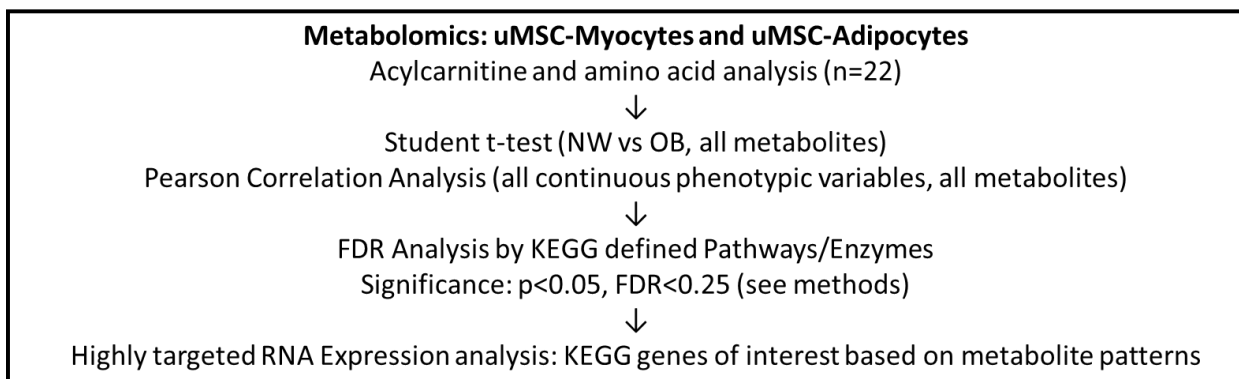

Supplementary Figures 1&2: Workflow diagrams for metabolomic (a) and transcriptomic (b) analyses in uMSC differentiated towards myocytes and adipocytes.

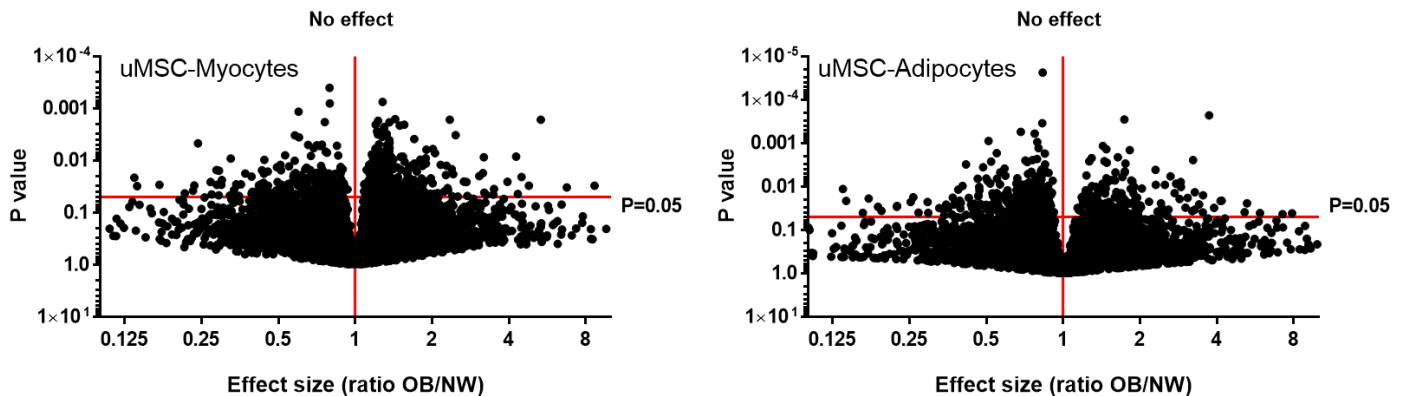

Figure S3&4: Volcano plot of differentially expressed genes (n=7 obese (OB) vs n=7 normal weight (NW)) found through RNA-Seq analysis of uMSC-myocytes (a) and uMSC-adipocytes (b). Protein coding genes with  $p \leq 0.05$  were entered into STRING to agnostically evaluate pathway enrichment.

**Supplemental Tables**

|                 | <b>Phenotype</b>         | <b>NW (N=12)</b>  | <b>OB (N=12)</b>  | <b>p-value</b>  |
|-----------------|--------------------------|-------------------|-------------------|-----------------|
| <b>Maternal</b> | Age at Delivery          | 28.92±5.36        | 27.92±6.79        | 0.71            |
|                 | <b>Pre-pregnancy BMI</b> | <b>21.12±1.16</b> | <b>36.35±4.19</b> | <b>7.49E-11</b> |
|                 | Free Fatty Acids (27wks) | 420.25±101.57     | 495±171.37        | 0.23            |
|                 | Glucose (27wks)          | 79.58±10.52       | 78.91±5.20        | 0.86            |
|                 | Insulin (27wks)          | 13.42±9.41        | 14.64±3.31        | 0.70            |
|                 | HOMA-IR (27wks)          | 2.82±2.43         | 2.87±0.75         | 0.95            |
|                 | Triglycerides (27wks)    | 151±35.52         | 161.3±42.35       | 0.60            |
| <b>Neonate</b>  | Infant Sex (M/F)         | 6/6               | 8/4               | 0.68            |
|                 | Gestational Age          | 39.86±0.88        | 39.38±0.59        | 0.17            |
|                 | Birth Weight             | 3367.25±376.13    | 3240.83±290.26    | 0.39            |
|                 | Fat Mass                 | 0.28±0.11         | 0.33±0.15         | 0.42            |
|                 | Fat Free Mass            | 2.91±0.25         | 2.76±0.25         | 0.18            |
|                 | Body Mass                | 3.19±0.30         | 3.09±0.31         | 0.45            |
|                 | % Fat Mass               | 8.74±2.97         | 10.45±4.07        | 0.28            |
|                 | % Fat Free Mass          | 91.26±2.97        | 89.55±4.07        | 0.28            |

**Table S1:** Categorical comparison of Maternal and Neonatal phenotypes in offspring of obese (NW) versus obese (OB) mothers.

| Table S2             |             |                        |                         |
|----------------------|-------------|------------------------|-------------------------|
| Phenotype            | Pathway     | Analyte                | p-value (r-value)       |
| ppBMI                | His         | 3-Methylhistidine      | <b>0.0199 (-0.4924)</b> |
|                      | 1C&Sulf     | Cysta:2ABU             | 0.0462 (0.4293)         |
|                      | Ala/Asp/Glu | Aspartic acid          | 0.0254 (0.4752)         |
| FFA (Total)          | Ala/Asp/Glu | Alanine                | <b>0.0027 (0.6202)</b>  |
|                      |             | Aspartic acid          | <b>0.0211 (0.4997)</b>  |
|                      | His         | 1-Methylhistidine      | <b>0.0484 (0.4357)</b>  |
| FFA (OB)             | Ala/Asp/Glu | Alanine                | <b>0.012 (0.7528)</b>   |
|                      | Phe/Tyr     | Phenylalanine          | <b>0.051 (0.6298)</b>   |
|                      |             | Total Aromatic         | <b>0.0536 (0.6246)</b>  |
|                      | His         | 1-Methylhistidine      | <b>0.0495 (0.633)</b>   |
|                      | LCAC        | C14                    | 0.044 (0.6452)          |
|                      | SCOH/MCOH   | C6OH                   | <b>0.0343 (0.6694)</b>  |
|                      |             | C5DC                   | <b>0.0091 (0.7707)</b>  |
| DCAC/MCOH            | C6DC        | <b>0.006 (0.7949)</b>  |                         |
|                      | Total DCAC  | <b>0.0203 (0.7143)</b> |                         |
| FFA (NW)             | Arg&Pro     | Beta-Alanine           | 0.0392 (-0.6263)        |
|                      | LCOH        | C16OH                  | 0.0514 (-0.5993)        |
| Triglycerides        | Ala/Asp/Glu | Gln:Asp                | <b>0.0283 (0.5162)</b>  |
|                      |             | Gln:Glu                | <b>0.0409 (0.486)</b>   |
|                      |             | Glutamine              | <b>0.0379 (0.4924)</b>  |
|                      |             | Asp:Asn                | <b>0.0055 (0.5836)</b>  |
| Insulin              | Arg&Pro     | Ornithine              | 0.0502 (0.4325)         |
|                      | CPT         | C0                     | <b>0.0127 (0.5338)</b>  |
| Glucose              | Ala/Asp/Glu | Asp:Asn                | <b>0.0095 (0.5521)</b>  |
|                      | DCAC/MCOH   | C6DC                   | <b>0.039 (-0.4533)</b>  |
|                      | 1C&Sulf     | Cys:AABU               | 0.0472 (0.4377)         |
|                      | Arg&Pro     | Arginine               | 0.0451 (-0.4415)        |
| Birth Weight         | 1C&Sulf     | Met:AABU               | 0.0509 (0.4212)         |
| Neonatal %FM (Total) | Ala/Asp/Glu | Alanine                | <b>0.0134 (0.5303)</b>  |
|                      |             | Aspartic acid          | <b>0.0176 (0.5122)</b>  |
|                      |             | Gln:Asp                | <b>0.0045 (-0.5938)</b> |
|                      |             | Gln:Glu                | <b>0.0248 (-0.4879)</b> |
|                      |             | Glutamine              | <b>0.0192 (-0.5061)</b> |
|                      | Arg&Pro     | Arg:Orn                | 0.0495 (-0.4338)        |
|                      | LCAC        | C12:1                  | <b>0.0461 (0.4396)</b>  |
|                      |             | C12                    | <b>0.0372 (0.4573)</b>  |
|                      |             | C14:1                  | <b>0.0136 (0.5295)</b>  |
|                      |             | C14                    | <b>0.0271 (0.4814)</b>  |
|                      |             | C16:1                  | <b>0.0034 (0.6093)</b>  |
|                      | LCOH        | Long (all+OH)          | <b>0.0311 (0.4711)</b>  |
|                      |             | C14:1OH                | <b>0.0014 (0.6513)</b>  |
|                      |             | C14OH                  | <b>0.0137 (0.5287)</b>  |
|                      |             | C16:1OH                | <b>0.0002 (0.7326)</b>  |
| LCHAD (all 12-18 OH) |             | <b>0.0018 (0.6383)</b> |                         |
| SCOH/MCOH            | C4OH        | <b>0.0247 (0.4883)</b> |                         |
| Neonatal %FM (OB)    | Ala/Asp/Glu | Alanine                | <b>0.0015 (0.8578)</b>  |
|                      |             | Gln:Asp                | <b>0.0331 (-0.6725)</b> |
|                      | LCAC        | C12:1                  | <b>0.007 (0.7865)</b>   |
|                      |             | C12                    | <b>0.018 (0.7235)</b>   |
|                      |             | C14:2                  | <b>0.0093 (0.7693)</b>  |
|                      |             | C14:1                  | <b>0.0022 (0.8421)</b>  |
|                      |             | C14                    | <b>0.0464 (0.6397)</b>  |
|                      |             | C16:1                  | <b>0.0199 (0.7157)</b>  |
|                      |             | C18:2                  | <b>0.0454 (0.6419)</b>  |
|                      |             | Long Chain (C12-18)    | <b>0.0395 (0.6558)</b>  |
|                      | LCOH        | Long (all+OH)          | <b>0.0135 (0.7448)</b>  |
|                      |             | C14:1OH                | <b>0.0214 (0.7101)</b>  |
|                      |             | C14OH                  | <b>0.0257 (0.6948)</b>  |
|                      |             | C16:1OH                | <b>0.001 (0.8709)</b>   |
|                      | SCOH/MCOH   | LCHAD (all 12-18 OH)   | <b>0.0064 (0.7911)</b>  |
| C4OH                 |             | <b>0.0398 (0.655)</b>  |                         |
| C5DC+C10OH           |             | <b>0.0042 (0.8139)</b> |                         |
| DCAC/MCOH            | C6DC        | <b>0.0445 (0.6438)</b> |                         |
|                      | Total DCAC  | <b>0.0049 (0.8056)</b> |                         |
| Neonatal %FM (NW)    | None        | None                   | None                    |

| Table S3             |                   |                     |                             |
|----------------------|-------------------|---------------------|-----------------------------|
| Phenotype            | Pathway           | Analyte             | p-value (r-value)           |
| ppBMI                | Arg&Pro           | Cit:Arg             | <b>0.0228 (-0.494)</b>      |
|                      |                   | Citrulline          | <b>0.0224 (-0.4955)</b>     |
|                      | CPT               | C16                 | <b>0.042 (-0.4474)</b>      |
|                      |                   | Long Chain (C12-18) | <b>0.033 (-0.4666)</b>      |
| FFA (Total)          | Ala/Asp/Glu       | Glu:Gln             | <b>0.0262 (-0.4958)</b>     |
| FFA (OB)             | None              | None                | None                        |
| FFA (NW)             | LCAC              | C14:2               | 0.0263 (-0.6625)            |
| Triglycerides        | LCOH              | C16:1OH             | <b>0.0149 (0.5788)</b>      |
|                      |                   | C16OH               | <b>0.029 (0.5289)</b>       |
|                      |                   | MCAC                | C8:1                        |
|                      | MCAC              | C10:1               | <b>0.0445 (0.4926)</b>      |
|                      |                   | DCAC/MCOH           | C5DC+C10OH                  |
| Insulin              | Ala/Asp/Glu       | Total DCAC          | <b>0.0221 (0.5503)</b>      |
|                      |                   | Asp:Asn             | <b>0.0196 (-0.517)</b>      |
|                      | LCOH              | Asparagine          | <b>&lt; 0.0001 (0.8342)</b> |
|                      |                   | C12                 | 0.051 (-0.4421)             |
|                      |                   | Asp:Asn             | <b>0.0251 (-0.499)</b>      |
| Glucose              | Ala/Asp/Glu       | Asparagine          | <b>0.0041 (0.613)</b>       |
|                      |                   | Gln:Glu             | <b>0.0422 (-0.4582)</b>     |
|                      | Arg&Pro           | Arg:Glu             | 0.0527 (-0.4393)            |
| Birthweight          | 1C&Sulf           | Taurine             | <b>0.0066 (0.5736)</b>      |
| Neonatal %FM (Total) | CPT               | C18                 | <b>0.0319 (-0.4806)</b>     |
|                      | DCAC/MCOH         | C3DC+C8OH           | <b>0.0102 (-0.5601)</b>     |
|                      | CPT               | C18                 | <b>0.0349 (-0.7023)</b>     |
| Neonatal %FM (OB)    | MCAC              | C8:1                | 0.0359 (-0.6996)            |
|                      |                   | SCOH/MCOH           | C4OH                        |
|                      | SCOH/MCOH         | C5OH                | <b>0.0256 (-0.7299)</b>     |
|                      |                   | DCAC/MCOH           | C3DC+C8OH                   |
|                      | Neonatal %FM (NW) | None                | None                        |

Table S2&3: Acylcarnitine and Amino Acid Analysis in uMSC-Myocytes (S2) and uMSC-adipocytes (S3) vs maternal and neonatal phenotypes. Total number analyzed n=22. Of note n=2 of our 24 samples did not have metabolomic analysis available. Listed are p-value (r-value), determined by linear regression analysis, for analytes with p-values ≤0.05. Green (positive correlation) and red (negative correlation) represent metabolite changes vs phenotypes if the FDR≤0.25.

| Biologic Process (GO) |                                                                |                   |                      |
|-----------------------|----------------------------------------------------------------|-------------------|----------------------|
| #Pathway ID           | Pathway Description                                            | Count in Gene Set | False Discovery Rate |
| GO.0006139            | nucleobase-containing compound metabolic process               | 134               | 0.00686              |
| GO.0010468            | regulation of gene expression                                  | 121               | 0.00686              |
| GO.0034654            | nucleobase-containing compound biosynthetic process            | 100               | 0.00686              |
| GO.0046483            | heterocycle metabolic process                                  | 137               | 0.00686              |
| GO.0051641            | cellular localization                                          | 74                | 0.00686              |
| GO.0051649            | establishment of localization in cell                          | 65                | 0.00686              |
| GO.1901360            | organic cyclic compound metabolic process                      | 142               | 0.00686              |
| GO.1901362            | organic cyclic compound biosynthetic process                   | 104               | 0.00846              |
| GO.0006725            | cellular aromatic compound metabolic process                   | 135               | 0.00876              |
| GO.0090304            | nucleic acid metabolic process                                 | 120               | 0.00876              |
| GO.0009058            | biosynthetic process                                           | 137               | 0.0097               |
| GO.0044271            | cellular nitrogen compound biosynthetic process                | 107               | 0.013                |
| GO.0010467            | gene expression                                                | 118               | 0.0134               |
| GO.0016070            | RNA metabolic process                                          | 107               | 0.0134               |
| GO.0034641            | cellular nitrogen compound metabolic process                   | 144               | 0.0154               |
| GO.0046907            | intracellular transport                                        | 50                | 0.0154               |
| GO.0051171            | regulation of nitrogen compound metabolic process              | 117               | 0.0154               |
| GO.1901576            | organic substance biosynthetic process                         | 133               | 0.0154               |
| GO.2000112            | regulation of cellular macromolecule biosynthetic process      | 109               | 0.0154               |
| GO.0010556            | regulation of macromolecule biosynthetic process               | 110               | 0.0163               |
| GO.0016197            | endosomal transport                                            | 16                | 0.0163               |
| GO.0032774            | RNA biosynthetic process                                       | 89                | 0.0163               |
| GO.1902582            | single-organism intracellular transport                        | 45                | 0.0167               |
| GO.0060255            | regulation of macromolecule metabolic process                  | 145               | 0.018                |
| GO.0019219            | regulation of nucleobase-containing compound metabolic process | 109               | 0.0229               |
| GO.0009889            | regulation of biosynthetic process                             | 114               | 0.025                |
| GO.0051252            | regulation of RNA metabolic process                            | 102               | 0.025                |
| GO.0008152            | metabolic process                                              | 231               | 0.0272               |
| GO.0031323            | regulation of cellular metabolic process                       | 149               | 0.0279               |
| GO.0031326            | regulation of cellular biosynthetic process                    | 112               | 0.0354               |
| GO.0006807            | nitrogen compound metabolic process                            | 148               | 0.037                |
| GO.1902580            | single-organism cellular localization                          | 35                | 0.0398               |
| GO.0034645            | cellular macromolecule biosynthetic process                    | 107               | 0.049                |
| GO.2001141            | regulation of RNA biosynthetic process                         | 98                | 0.0498               |

Table S4: GO Biologic Processes enriched in differential gene expression in uMSC-Myocytes from offspring of obese (n=7) versus normal weight (n=7) mothers. Analyzed by student t-test, with genes having significant p-values entered into STRING database analysis.

| KEGG Pathways |                                   |                   |                      |
|---------------|-----------------------------------|-------------------|----------------------|
| #Pathway ID   | Pathway Description               | Count in Gene Set | False Discovery Rate |
| 4810          | Regulation of actin cytoskeleton  | 23                | 8.93E-06             |
| 4722          | Neurotrophin signaling pathway    | 15                | 0.000138             |
| 5205          | Proteoglycans in cancer           | 20                | 0.000447             |
| 4010          | MAPK signaling pathway            | 19                | 0.00545              |
| 4015          | Rap1 signaling pathway            | 17                | 0.00545              |
| 4919          | Thyroid hormone signaling pathway | 12                | 0.00545              |
| 4152          | AMPK signaling pathway            | 12                | 0.00623              |
| 4510          | Focal adhesion                    | 16                | 0.00834              |
| 5211          | Renal cell carcinoma              | 8                 | 0.0144               |
| 4014          | Ras signaling pathway             | 16                | 0.0164               |
| 5215          | Prostate cancer                   | 9                 | 0.0183               |
| 5200          | Pathways in cancer                | 20                | 0.0221               |
| 5131          | Shigellosis                       | 7                 | 0.025                |
| 4151          | PI3K-Akt signaling pathway        | 20                | 0.034                |
| 5166          | HTLV-I infection                  | 16                | 0.0436               |
| 4012          | ErbB signaling pathway            | 8                 | 0.045                |
| 5213          | Endometrial cancer                | 6                 | 0.0483               |

Table S5: KEGG Pathways enriched in differential gene expression in uMSC-Adipocytes from offspring of obese (n=7) versus normal weight (n=7) mothers. Analyzed by student t-test, with genes having significant p-values entered into STRING database analysis.

| Phenotype | Pathway Source | Pathway of Interest | p-value | FD R  | Enrichment Score | Enrichment Core Genes                                                                                                                        |
|-----------|----------------|---------------------|---------|-------|------------------|----------------------------------------------------------------------------------------------------------------------------------------------|
| ppB MI    | KEGG           | mTOR Signaling      | 0       | 0.003 | -0.68            | RPTOR, MAPK(1,3,8), TSC(1&2), AKT(1-3), BRAF, EIF4E2, PRKA(A1,CA,CB,R2A,R2B), ULK2, CAB(39&39L)                                              |
|           | KEGG           | MAPK Signaling      | 0       | 0.007 | -0.67            | MAPK(1,3,8,9), MAP2K1, MAPK3K7, MKNK1, SOS(1&2), AKT(1-3), PRKA(CA&CB), NRAS, KRAS, BRAF, RAF1, IKBKB, HSPA8, CRK, CRKL                      |
|           | KEGG           | Insulin Signaling   | 0       | 0.004 | -0.56            | IRS1, RPTOR, PRKA(A1,CA,CB,R1A,R2A,R2B), PRKCI, PIK3(CA,CB,CD,R1), GSK3B, MAPK(1,3,8,9), MAP2K1, AKT(1-3), SOS(1&2), RAF1, BRAF, NRAF, CALM3 |
|           | KEGG           | Adipokine Signaling | 0       | 0.007 | -0.55            | LEPR, ADIPOQR2, PPARA, CPT2, ACSL1, IRS1, PRKA(A1,G2,R2), CAMKK(1&2), MAPK(8&9), AKT(1-3), IKBKB                                             |
|           | Reactome       | Signaling by FGFR   | 0       | 0.007 | -0.72            | CREB1, PDPK1, PIK3R1, FOXO3, GSK3A, CAMK4, CALM3, NRAS, KRAS, RAF1, AKT(1-3), MAPK(1&3), MAPK2K1, MKNK1, PRKA(CA,CB,R1A,R2A)                 |
|           | Biocarta       | CREB Pathway        | 0.002   | 0.01  | -0.74            | CREB1, MAPK(1&3), AKT1, PRKA(CB, R1A, R2A), CAMK2(B&D), GRB2, SOS1                                                                           |
|           | KEGG           | Apoptosis           | 0.002   | 0.01  | -0.62            | EXOG, IKBKB, AKT(1-3), PIK3(CA,CB,CD,R1), PRKA(CA,CB,R2A,R2B)                                                                                |
|           | Reactome       | Immune System       | 0.004   | 0.004 | -0.61            | EP300, CREB1, FOXO(1&3), SMURF(1&2), PARK2, IRS1, CAMK2(B&D), IKBKB, AKT(1-3), PIK3(CA,CB,CD,C3,R1, AP1), MAPK(1,3,8,9,3K7), MAP2K1          |

|                         |          |                                                               |       |      |       |                                                                                                                                                                                                                                                                                                                             |
|-------------------------|----------|---------------------------------------------------------------|-------|------|-------|-----------------------------------------------------------------------------------------------------------------------------------------------------------------------------------------------------------------------------------------------------------------------------------------------------------------------------|
|                         | KEGG     | Wnt Signaling                                                 | 0.008 | 0.02 | -0.67 | EP300, CREBBP, CAMK2(B&D), PPP2R(1A,5A, 5B, 5D, 5E), PPP2CB, PRKACB, MAPK(8,9,3K7), GSK3B, CCND(1&3)                                                                                                                                                                                                                        |
| <b>Free Fatty Acids</b> | KEGG     | mTOR Signaling                                                | 0.04  | 0.21 | -0.56 | RPTOR, MAPK(1&3), TSC(1&2), PIK3(CA,CB,R1,R2), AKT3, ULK(1&2), BRAF, PRKAA2, CAB39L, STRADA                                                                                                                                                                                                                                 |
|                         | KEGG     | MAPK Signaling                                                | 0.03  | 0.23 | -0.58 | MAPK(1,3,8), MKNK1, SOS(1&2), AKT(2&3), PRKA (CA&CG), NRAS, KRAS, BRAF, IKBKB, HSPA(1A,1B,6,8), CRK, CRKL                                                                                                                                                                                                                   |
|                         | Reactome | Transcriptional Regulation of White Adipocyte Differentiation | 0.04  | 0.19 | -0.72 | EP300, CREBBP, PPARA                                                                                                                                                                                                                                                                                                        |
|                         | Reactome | Energy Dependent Regulation of mTOR by LKB1 (STK11) AMPK      | 0.03  | 0.2  | -0.59 | PRKA(A2,B1,B2,G2), TSC(1&2), RPTOR, CAB39L                                                                                                                                                                                                                                                                                  |
|                         | KEGG     | Phosphatidylinositol Signaling System                         | 0.02  | 0.2  | -0.57 | PIK3(CA, CB, C2A, C2B, R1, R2), INPPL                                                                                                                                                                                                                                                                                       |
|                         | Reactome | Integration of Energy Metabolism                              | 0.03  | 0.19 | -0.5  | PRKA(A2,B2,G2,CA,CG,R1A,R1B,R2A), ACAC(A&B), FASN, ACLY                                                                                                                                                                                                                                                                     |
|                         | KEGG     | Oxidative Phosphorylation                                     | 0.02  | 0.15 | 0.6   | NDUF(A1,A2,A3,A4,A5,A6,A7,A8,A11, AB1,B1,B2,B3,B4,B6,B7,B8,B10,C1,C2, S2,S3,S5,S6,S7,S8,V2), SDH(B,C,D), UQCR(B,FS1,H,Q,10,11), COX(5B,6A1,6A1,6B1,6C,7A2,7A2L,7B, 7C,8A,11), LHPP, PPA(1,2), TCIRG1, ATP5(B,H,D,G1,G3,J,J2,L,T) (note: only Mitochondrial Complex, TCA Cycle, and Fatty Acid Oxidations genes in data set) |
| <b>Triglycerides</b>    | Reactome | Glycogen Breakdown Glycogenolysis                             | 0.004 | 0.16 | -0.58 | CALM1, PHKG2, PYG(L&M)                                                                                                                                                                                                                                                                                                      |
|                         | Reactome | Synthesis of PIP at the Late Endosome Membrane                | 0.002 | 0.16 | -0.89 | PIK3(C2A&R4)                                                                                                                                                                                                                                                                                                                |



|                     |          |                                                          |                  |                  |       |                                                                                                                                                                                                              |
|---------------------|----------|----------------------------------------------------------|------------------|------------------|-------|--------------------------------------------------------------------------------------------------------------------------------------------------------------------------------------------------------------|
| <b>Glucose</b>      | None     | None                                                     | N<br>o<br>n<br>e | N<br>o<br>n<br>e | None  | None                                                                                                                                                                                                         |
| <b>Insulin</b>      | None     | None                                                     | N<br>o<br>n<br>e | N<br>o<br>n<br>e | None  | None                                                                                                                                                                                                         |
| <b>HOMA</b>         | KEGG     | Histidine Metabolism                                     | 0.<br>00<br>2    | 0.<br>12         | 0.74  | ALDH(1A3, 1B1, 3B2), MAOB, HNMT                                                                                                                                                                              |
| <b>Neonatal %FM</b> | Biocarta | Leptin Pathway                                           | 0.<br>04         | 0.<br>24         | -0.72 | LEPR, CPT1A, PRKA(B2,G1,G2), ACACA                                                                                                                                                                           |
|                     | Reactome | Downregulation of TGF Beta Receptor Signaling            | 0.<br>03         | 0.<br>19         | -0.71 | PPP1C(A,B,C), SMURF(1&2)                                                                                                                                                                                     |
|                     | Reactome | CA Dependent Events                                      | 0.<br>04         | 0.<br>24         | -0.67 | CALM1, CAMK4, PRKA(CB,R1A,R2A), MAPK1                                                                                                                                                                        |
|                     | Reactome | Energy Dependent Regulation of mTOR by LKB1 (STK11) AMPK | 0.<br>03         | 0.<br>21         | -0.58 | RPTOR, STRADA, TSC(1&2), PRKA(B2, G1, G2)                                                                                                                                                                    |
|                     | KEGG     | Phosphatidylinositol Signaling System                    | 0.<br>00<br>8    | 0.<br>25         | -0.59 | PIK3(CA,CB,CD,C2A,C3,R1,R2), CALM1                                                                                                                                                                           |
|                     | KEGG     | NK Cell Mediated Activity                                | 0.<br>04         | 0.<br>24         | -0.55 | MAPK(1&3), PIK3(CA,CB,CD,R1), SOS(1&2), KRAS, NRAS, BRAF, RAF1                                                                                                                                               |
|                     | Reactome | Signaling by FGFR                                        | 0.<br>04         | 0.<br>24         | -0.57 | PRKA(CB,R1A,R2A), MAPK(1&3), PIK3(CA&R1), SOS1, TSC(1&2), AKT3, KRAS, NRAS, BRAF, RAF1, CALM1, CAMK4, CBL, FOXO3, PDPK1, PPP2(CB&R1A)                                                                        |
|                     | Reactome | Integration of Energy Metabolism                         | 0.<br>07         | 0.<br>21         | -0.5  | PRKA(B2,CB,CA,G2,R1A,R2A), PPP2(CB,R1A,R5D), ACAC, SLC25A5                                                                                                                                                   |
|                     | KEGG     | Oxidative Phosphorylation                                | 0.<br>00<br>8    | 0.<br>11         | 0.56  | NDUF(A1,A2,A3,A4,A5,A6,A7,A8,A11, AB1,B1,B2,B3,B4,B5,B6,B7,B8,B10,C1, C2,S3,S5,S6,S7,S8), SDH(A&C), UQCR(B,H,Q,10,11), COX(5A,5B,6B1,6C,7A2,7B,7C,8A,17), TCIRG1, LHPP, ATP5(D,E,G1,G3,H,J,J2,L) (note: only |

|  |  |  |  |  |  |                                                        |
|--|--|--|--|--|--|--------------------------------------------------------|
|  |  |  |  |  |  | Mitochondrial Complex and TCA Cycle genes in data set) |
|--|--|--|--|--|--|--------------------------------------------------------|

Table S6: uMSC-Adipocyte targeted RNA-Seq analysis by GSEA using a curated gene set enriched for nutrient sensing and energy processing pathways. Leading edge analysis of core genes indicates significant overlap between ppBMI, FFA, and Neonatal %FM for genes in MAPK and mTOR signaling

## Supplemental Experimental Procedure

### uMSC Growth and Conditions

Undifferentiated cells (Pass 2-3) from offspring NW and OB mothers were thawed and grown to confluence in MSC growth media (MSC-GM; Lonza, Walkersville, MD). Cells were then sub-cultured into experimental plates. Once cells returned to confluence, they were separately exposed to myocyte differentiation media and adipocyte differentiation media. Information regarding stage of differentiation state can be found in Boyle et al, 2016, as well as Janderoova et al, 2003 and Gang et al, 2004 from which we based our protocols. The adipogenic differentiating uMSCs were induced for three cycles, with media changes every three days, and myogenic media was changed every 3 to 4 days. Media was harvested by pooling 3x500uL aliquots (500uL per well, 24 wells per plate) for analysis on day 21 of differentiation, following approximately 3 days continuous media exposure. Mean media exposure times at harvest did not differ significantly between NW and OB cohorts for uMSC-Myocytes ( $3.4\pm 1.0$  vs  $3.8\pm 0.9$  days,  $p=0.62$ ) and uMSC-adipocytes ( $3.2\pm 1.0$  vs  $3.7\pm 0.8$  days,  $p=0.45$ ).

### Media Metabolomic Analysis

Using the Biochrom 30+ Amino Acid Analyzer 32 total amino acids were analyzed. Amino acid reaction ratios were calculated, as the ratio of product over substrate of a known amino acid associated reaction. Lower ratios corresponded to a more favorable reaction. Using MS/MS-ESI, 38 primary acylcarnitine species were analyzed, as well as calculated totals of short (C0-C5), medium (C6-C12), dicarboxylic acid (C3DC-C6DC), and long chain species (C14-C18) with and without hydroxyl groups. All analytes were placed in the context of known KEGG pathways. These included the central metabolic pathway for the Citric Acid Cycle (map00020), and input pathways including Ala/Asp/Glu (map00250), Val/Leu/Ile Degradation (map00280), Tyrosine (map00350, which includes Phenylalanine), Cysteine, Methionine, Glycine, Serine, and Threonine (map00270 and 00260, considered 1-Carbon metabolism), Arginine and Proline (map00330), Lysine (map00310), Tryptophan (map00380), and Histidine (map00340) metabolism. Acylcarnitines were associated with pathways of fatty acid oxidation (map00071) which can be further characterized by specific enzymatic reactions defined by acylcarnitine signature

### RNA-Seq Analysis

Cells were washed in PBS and lysed. Lysate was flash frozen in liquid nitrogen and stored at  $-80^{\circ}\text{C}$  until the RNA was extracted at a later date. RNA extraction and purification was done using the miRNEasy Minikit (Qiagen). Purified RNA samples were sent to the University of Colorado Genomics Core Laboratory for analysis. Mapping and Bioinformatics analysis were supported in part by the Biostatistics Shared Resources of Colorado's NIH/NCI Cancer Center (support grant P30CA046934). Quality control was done to trim reads to Q15 quality score, removing anything that was trimmed to less than 40 base pairs. Reads were mapped to hg19 with GSNAP, using dbSNP to guide mapping. Expression was called using Cufflinks. Genes were removed if mean reads per group (NW or OB) were less than 0.1 FPKM, or there were more than 50% of subjects without reads in either group. Further, in both STRING and GSEA curated dataset analysis only protein coding genes were included.

### Statistical Analysis

STRING Database 10.0 was used to analyze for RNA-Seq enrichment in genes with OB vs NW p-values  $<0.05$ . Output is a single p-value for protein-protein (or in this case gene-gene) interaction. Go Biological Processes and KEGG pathway enrichment significance is expressed by FDR value calculated in silico by Benjamini-Hochberg, and in all cases for STRING was  $<0.05$ . Analysis was stringently limited to only those interactions with confidence values of  $>0.9$ . Gene Set Enrichment Analysis (GSEA, <http://www.broad.mit.edu/gsea/>) was used to analyze continuous variables versus continuous gene expression values in a hand-curated dataset using KEGG defined pathways in nutrient sensing and energy metabolism listed above. Total genes in this gene set were  $\sim 1150$  after quality control. Subsets of mitochondrial oxidative phosphorylation genes were analyzed separately. GSEA methods and interpretation have been well described.
